# Supplementary material
Source: ML conference proceedings conference paper supplement (https://openreview.net/forum?id=SZ4G8L8j5l5)
Supplement: supplementary_material [file attachment]

**Theorem 3** (PNG Finds Local Optimum). *Under Assumption 1, we have*

*If  $\theta_t \notin \mathcal{P}_e$  is a fixed point of the algorithm, that is,  $\frac{d\theta_t}{dt} = -v_t = 0$ , and  $F, \ell$  are convex in a neighborhood  $\overline{\theta_t}$ , then  $\theta_t$  is a local minimum of  $F$  in the Pareto closure  $\{\theta_t\}$ , that is, there exists a neighborhood of  $\theta_t$  in which there exists no point  $\theta'$  such that  $F(\theta') < F(\theta_t)$  and  $\ell(\theta') \preceq \ell(\theta_t)$ .*

*If  $\theta_t \in \mathcal{P}_e$ , we have  $v_t = \nabla F(\theta_t)$ , and hence a fixed point with  $\frac{d\theta_t}{dt} = -v_t = 0$  is an unconstrained local minimum of  $F$  when  $F$  is locally convex on  $\theta_t$ .*
