# Supplementary material
Source: ML conference proceedings conference paper supplement (https://openreview.net/forum?id=SZ4G8L8j5l5)

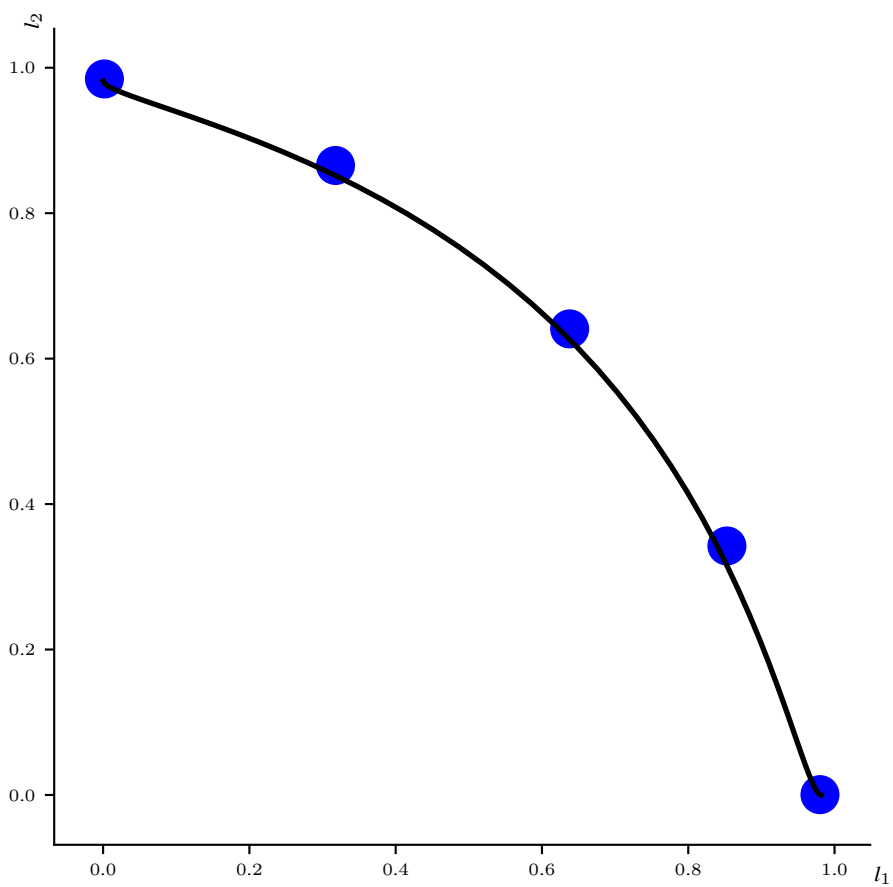

Supplement: supplementary_material [file attachment]

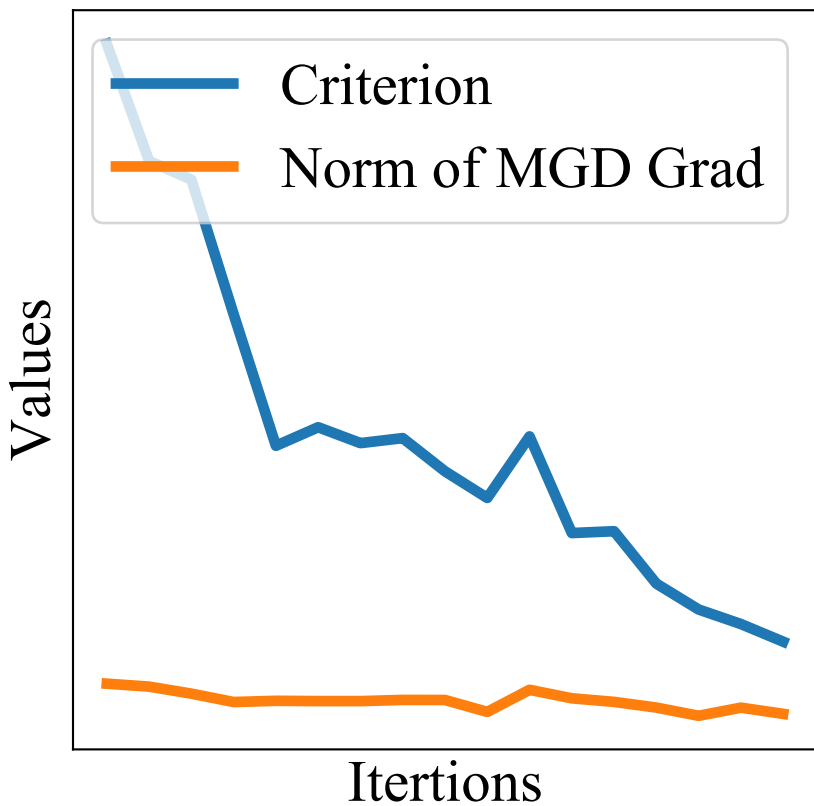

Supplement: supplementary_material [file attachment]

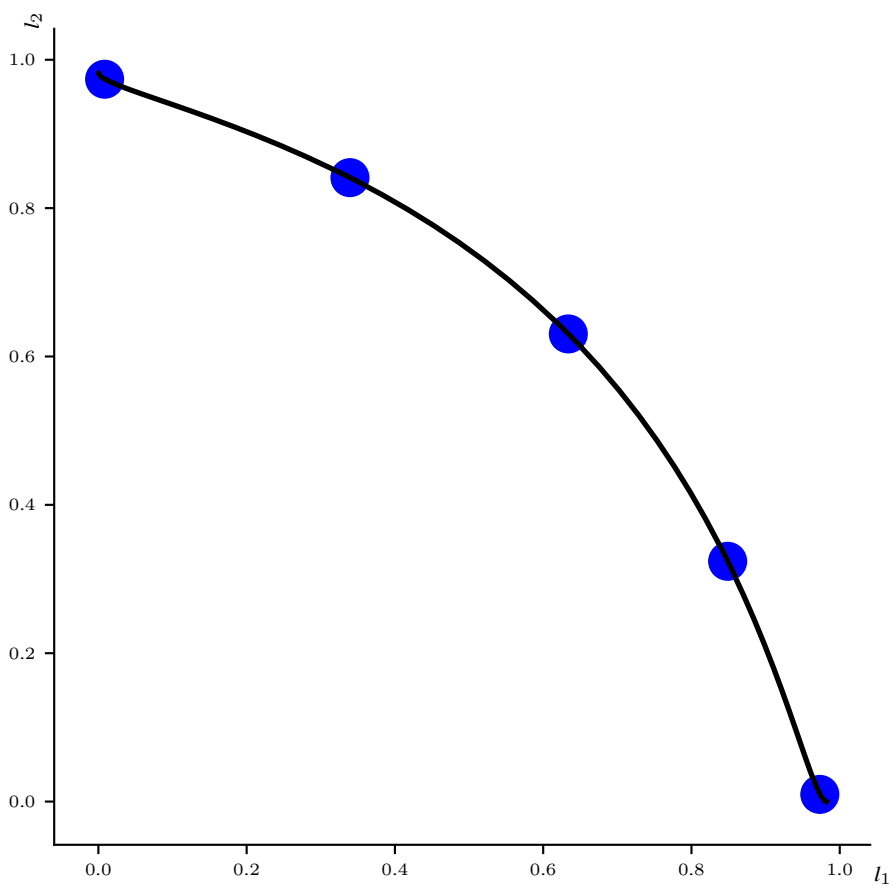

Supplement: supplementary_material [file attachment]

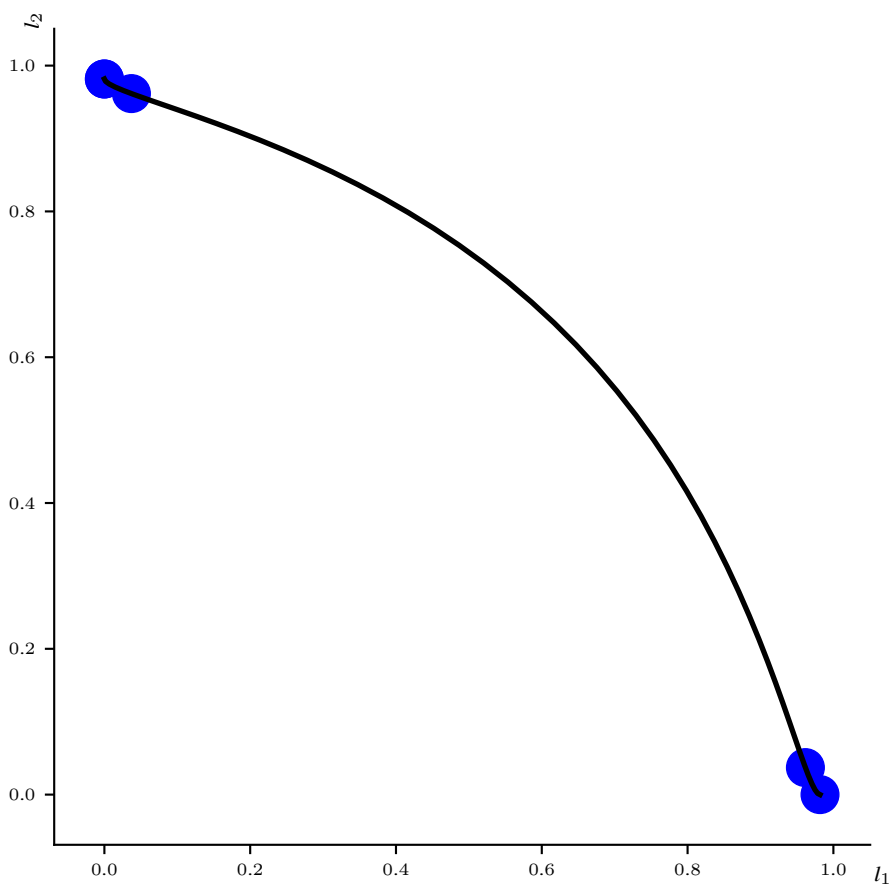

Supplement: supplementary_material [file attachment]

# task preference

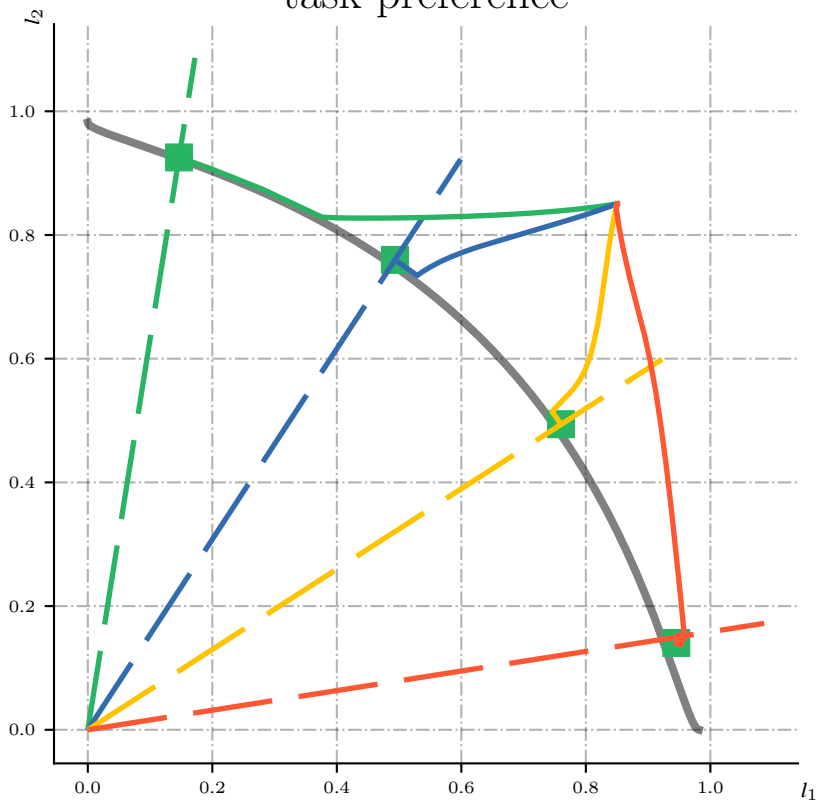

Supplement: supplementary_material [file attachment]

# task preference

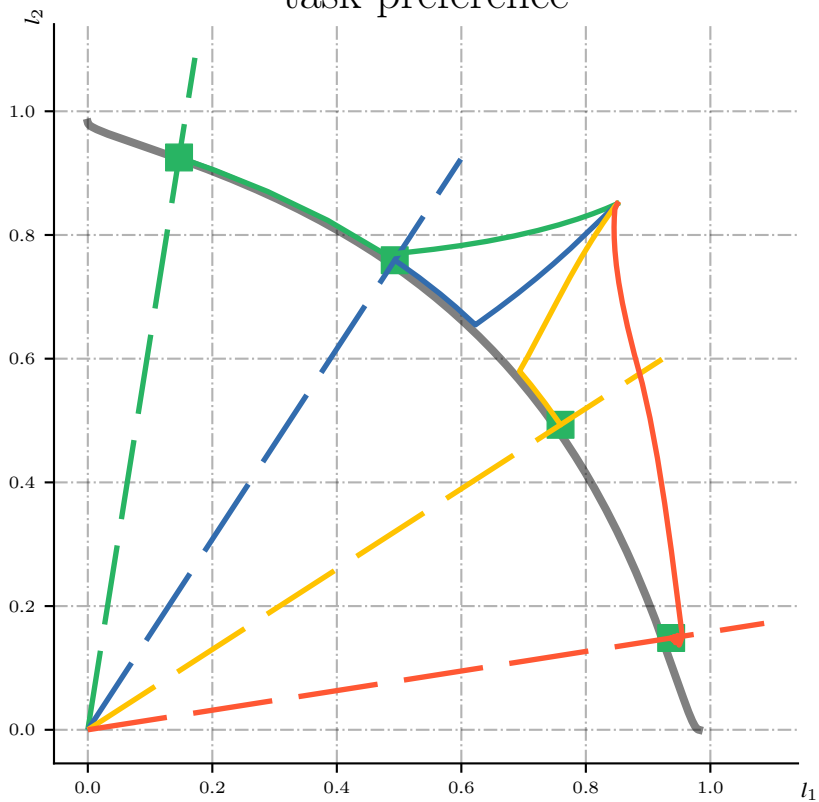

Supplement: supplementary_material [file attachment]

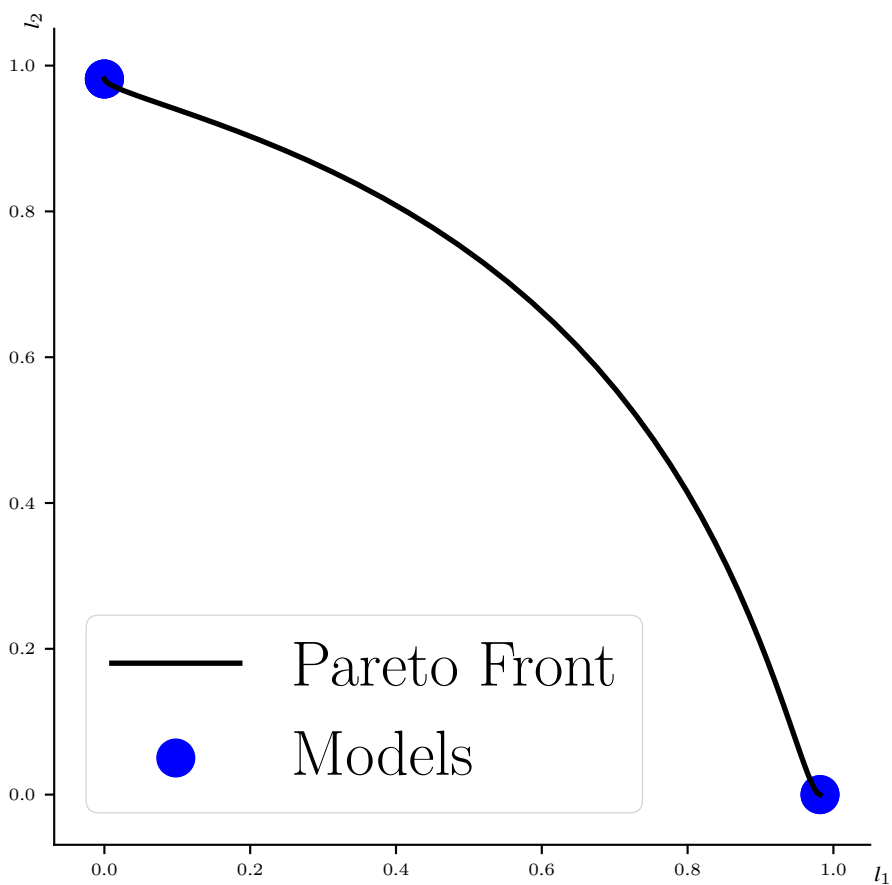

Supplement: supplementary_material [file attachment]

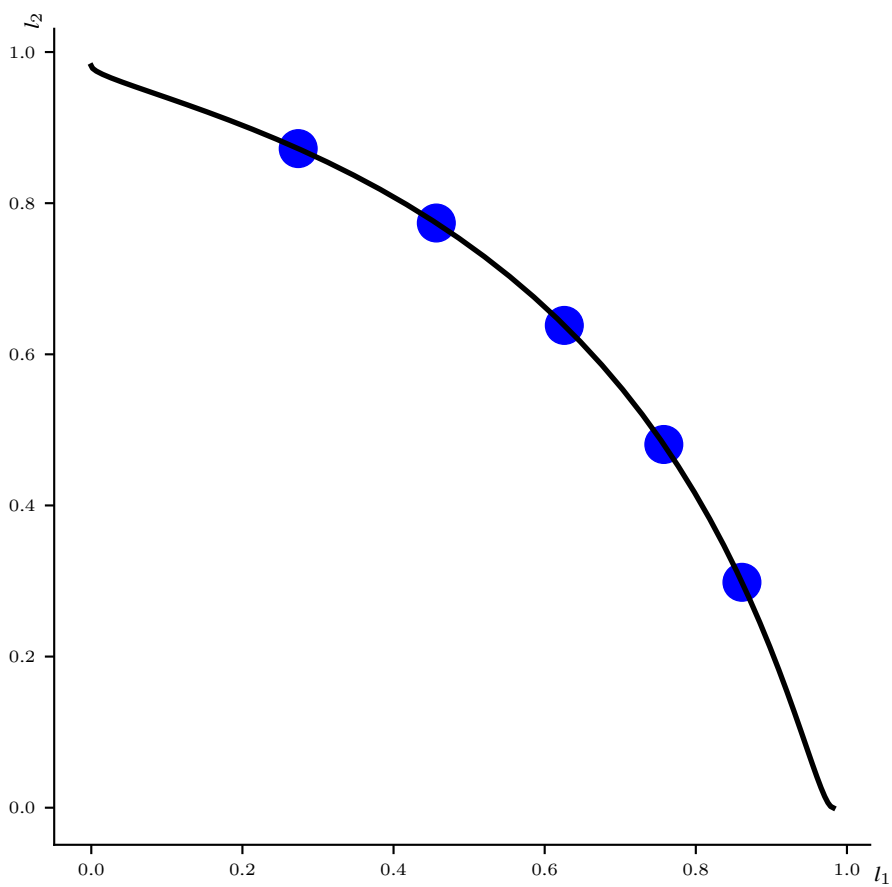

Supplement: supplementary_material [file attachment]

# task preference

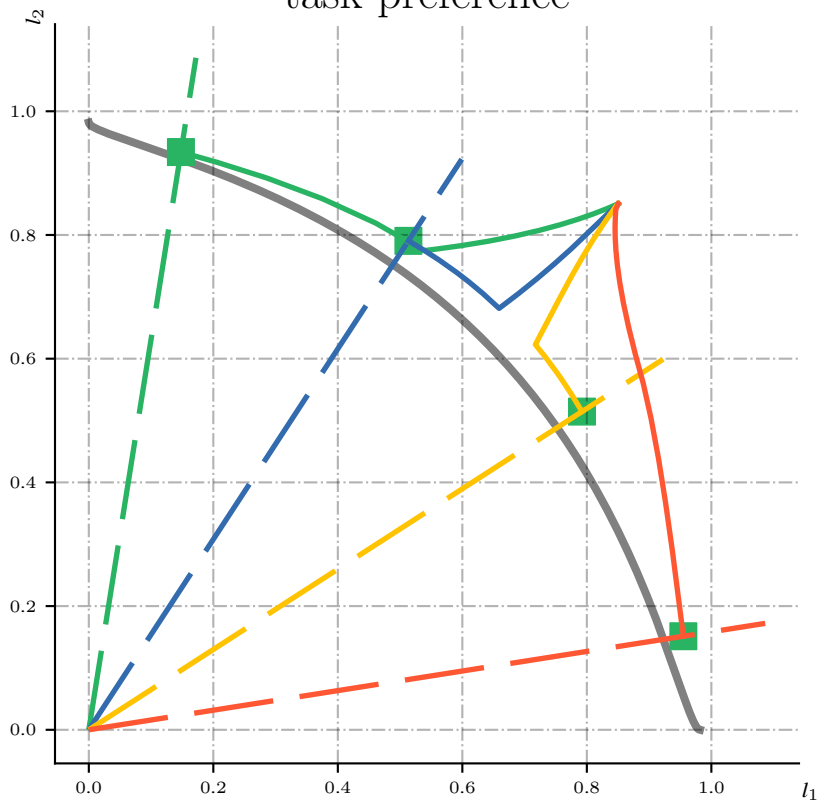

Supplement: supplementary_material [file attachment]

# task preference

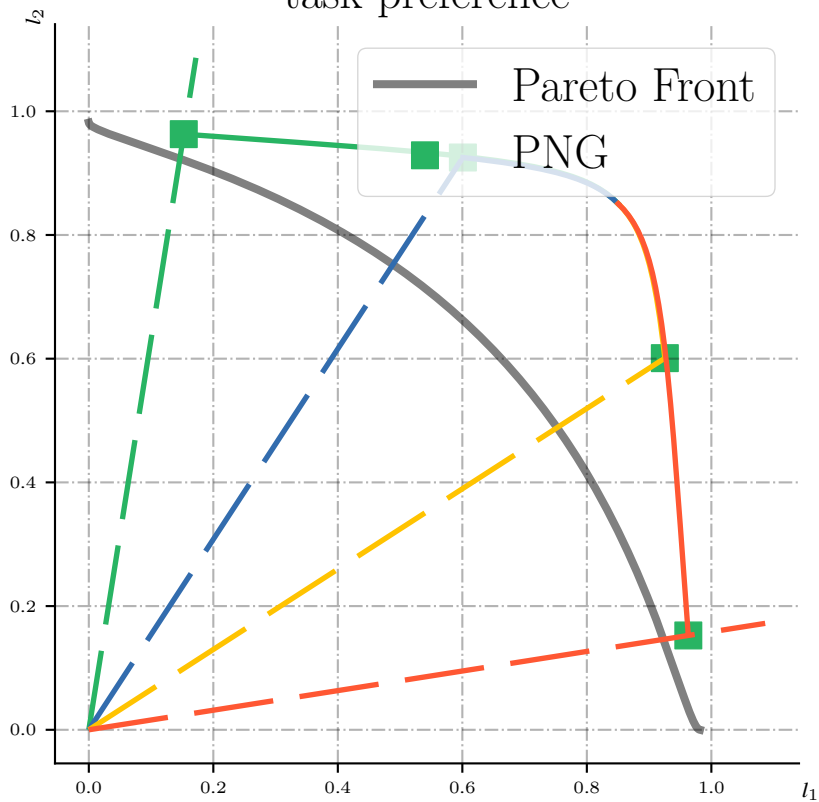

Supplement: supplementary_material [file attachment]

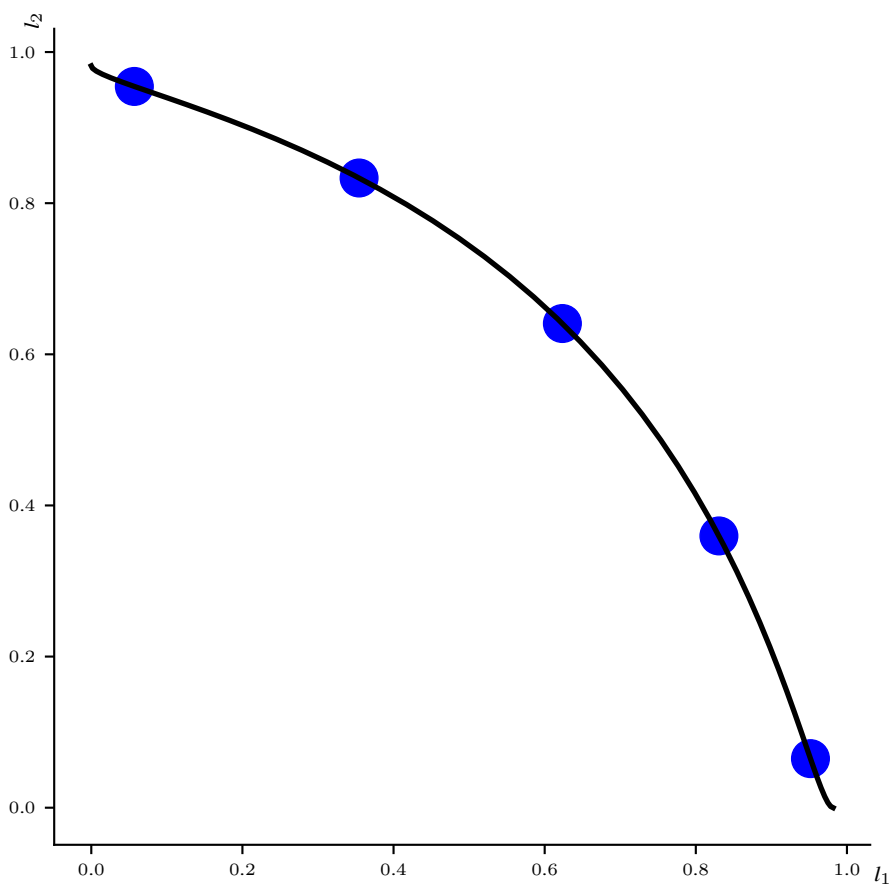

Supplement: supplementary_material [file attachment]

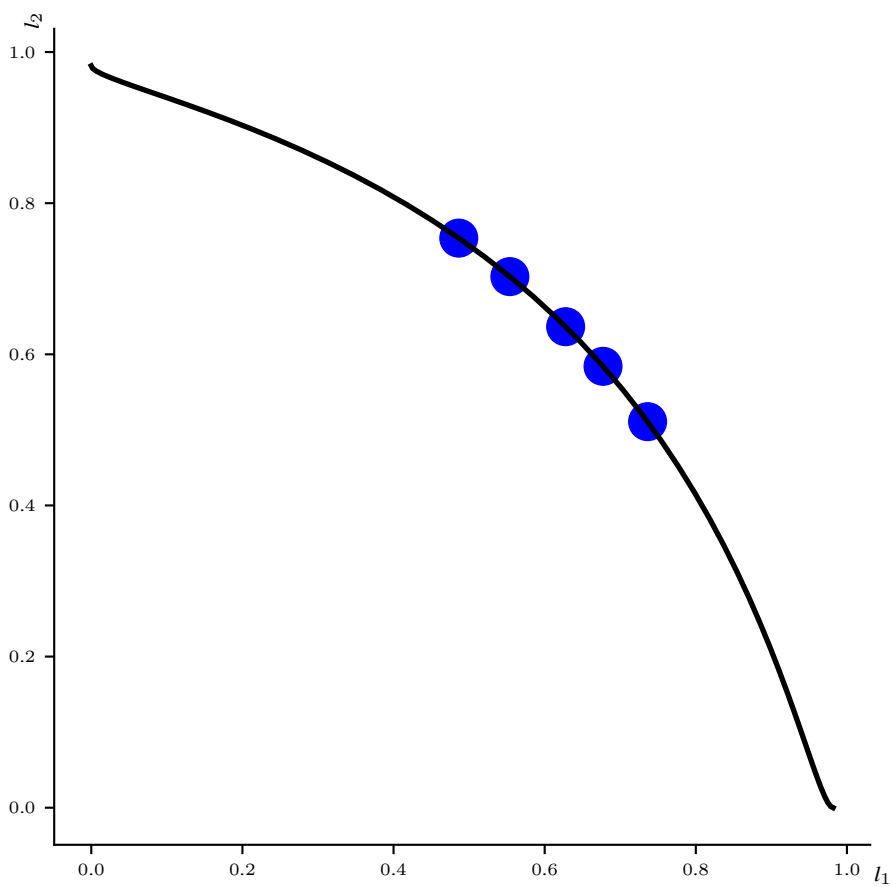

Supplement: supplementary_material [file attachment]

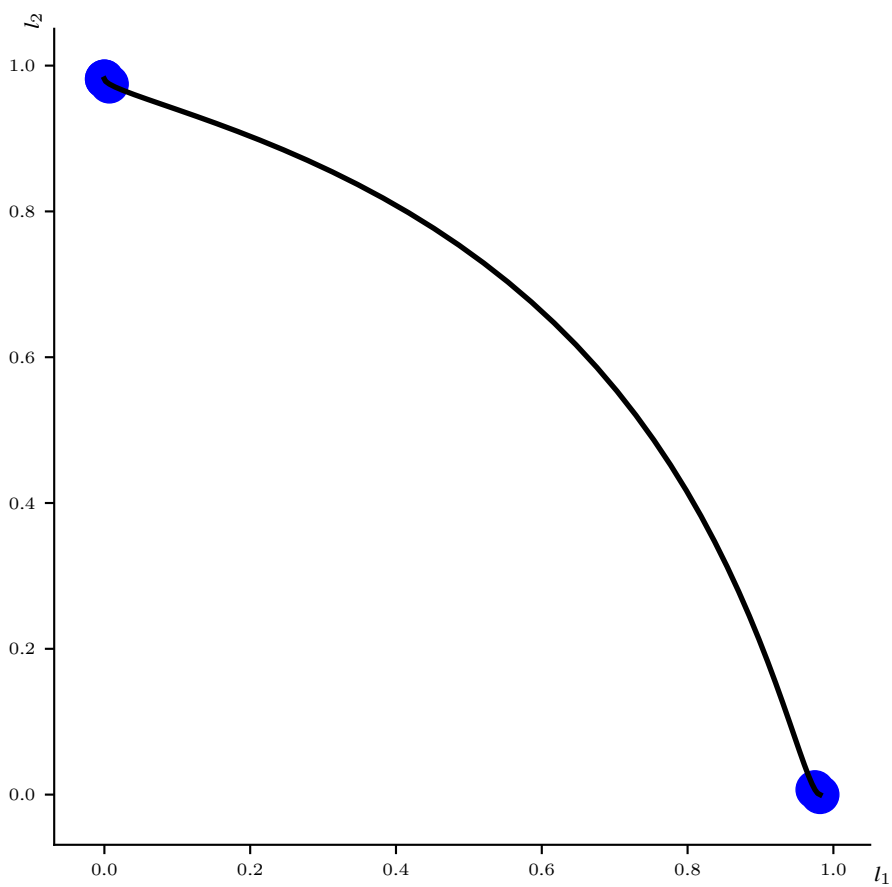

Supplement: supplementary_material [file attachment]

# task preference

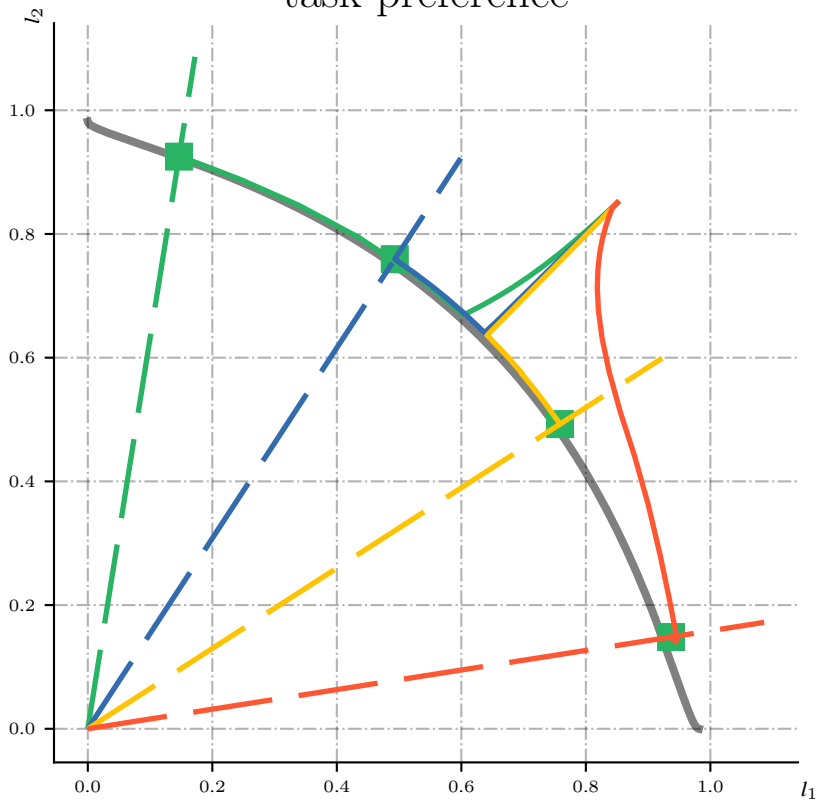

Supplement: supplementary_material [file attachment]

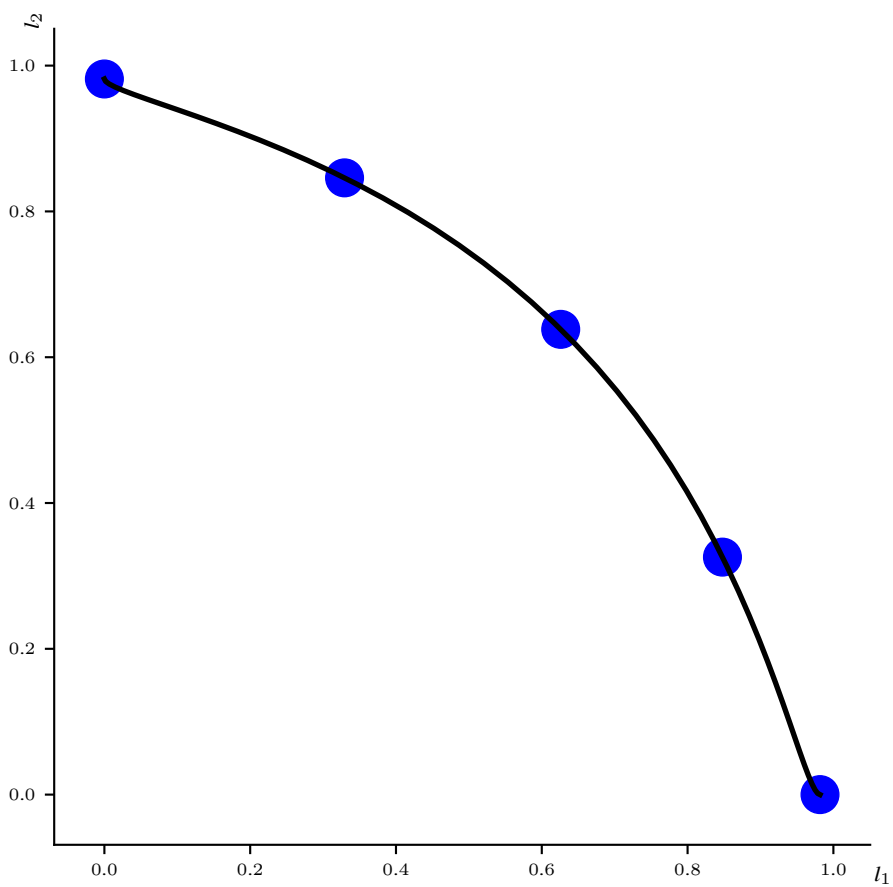

Supplement: supplementary_material [file attachment]

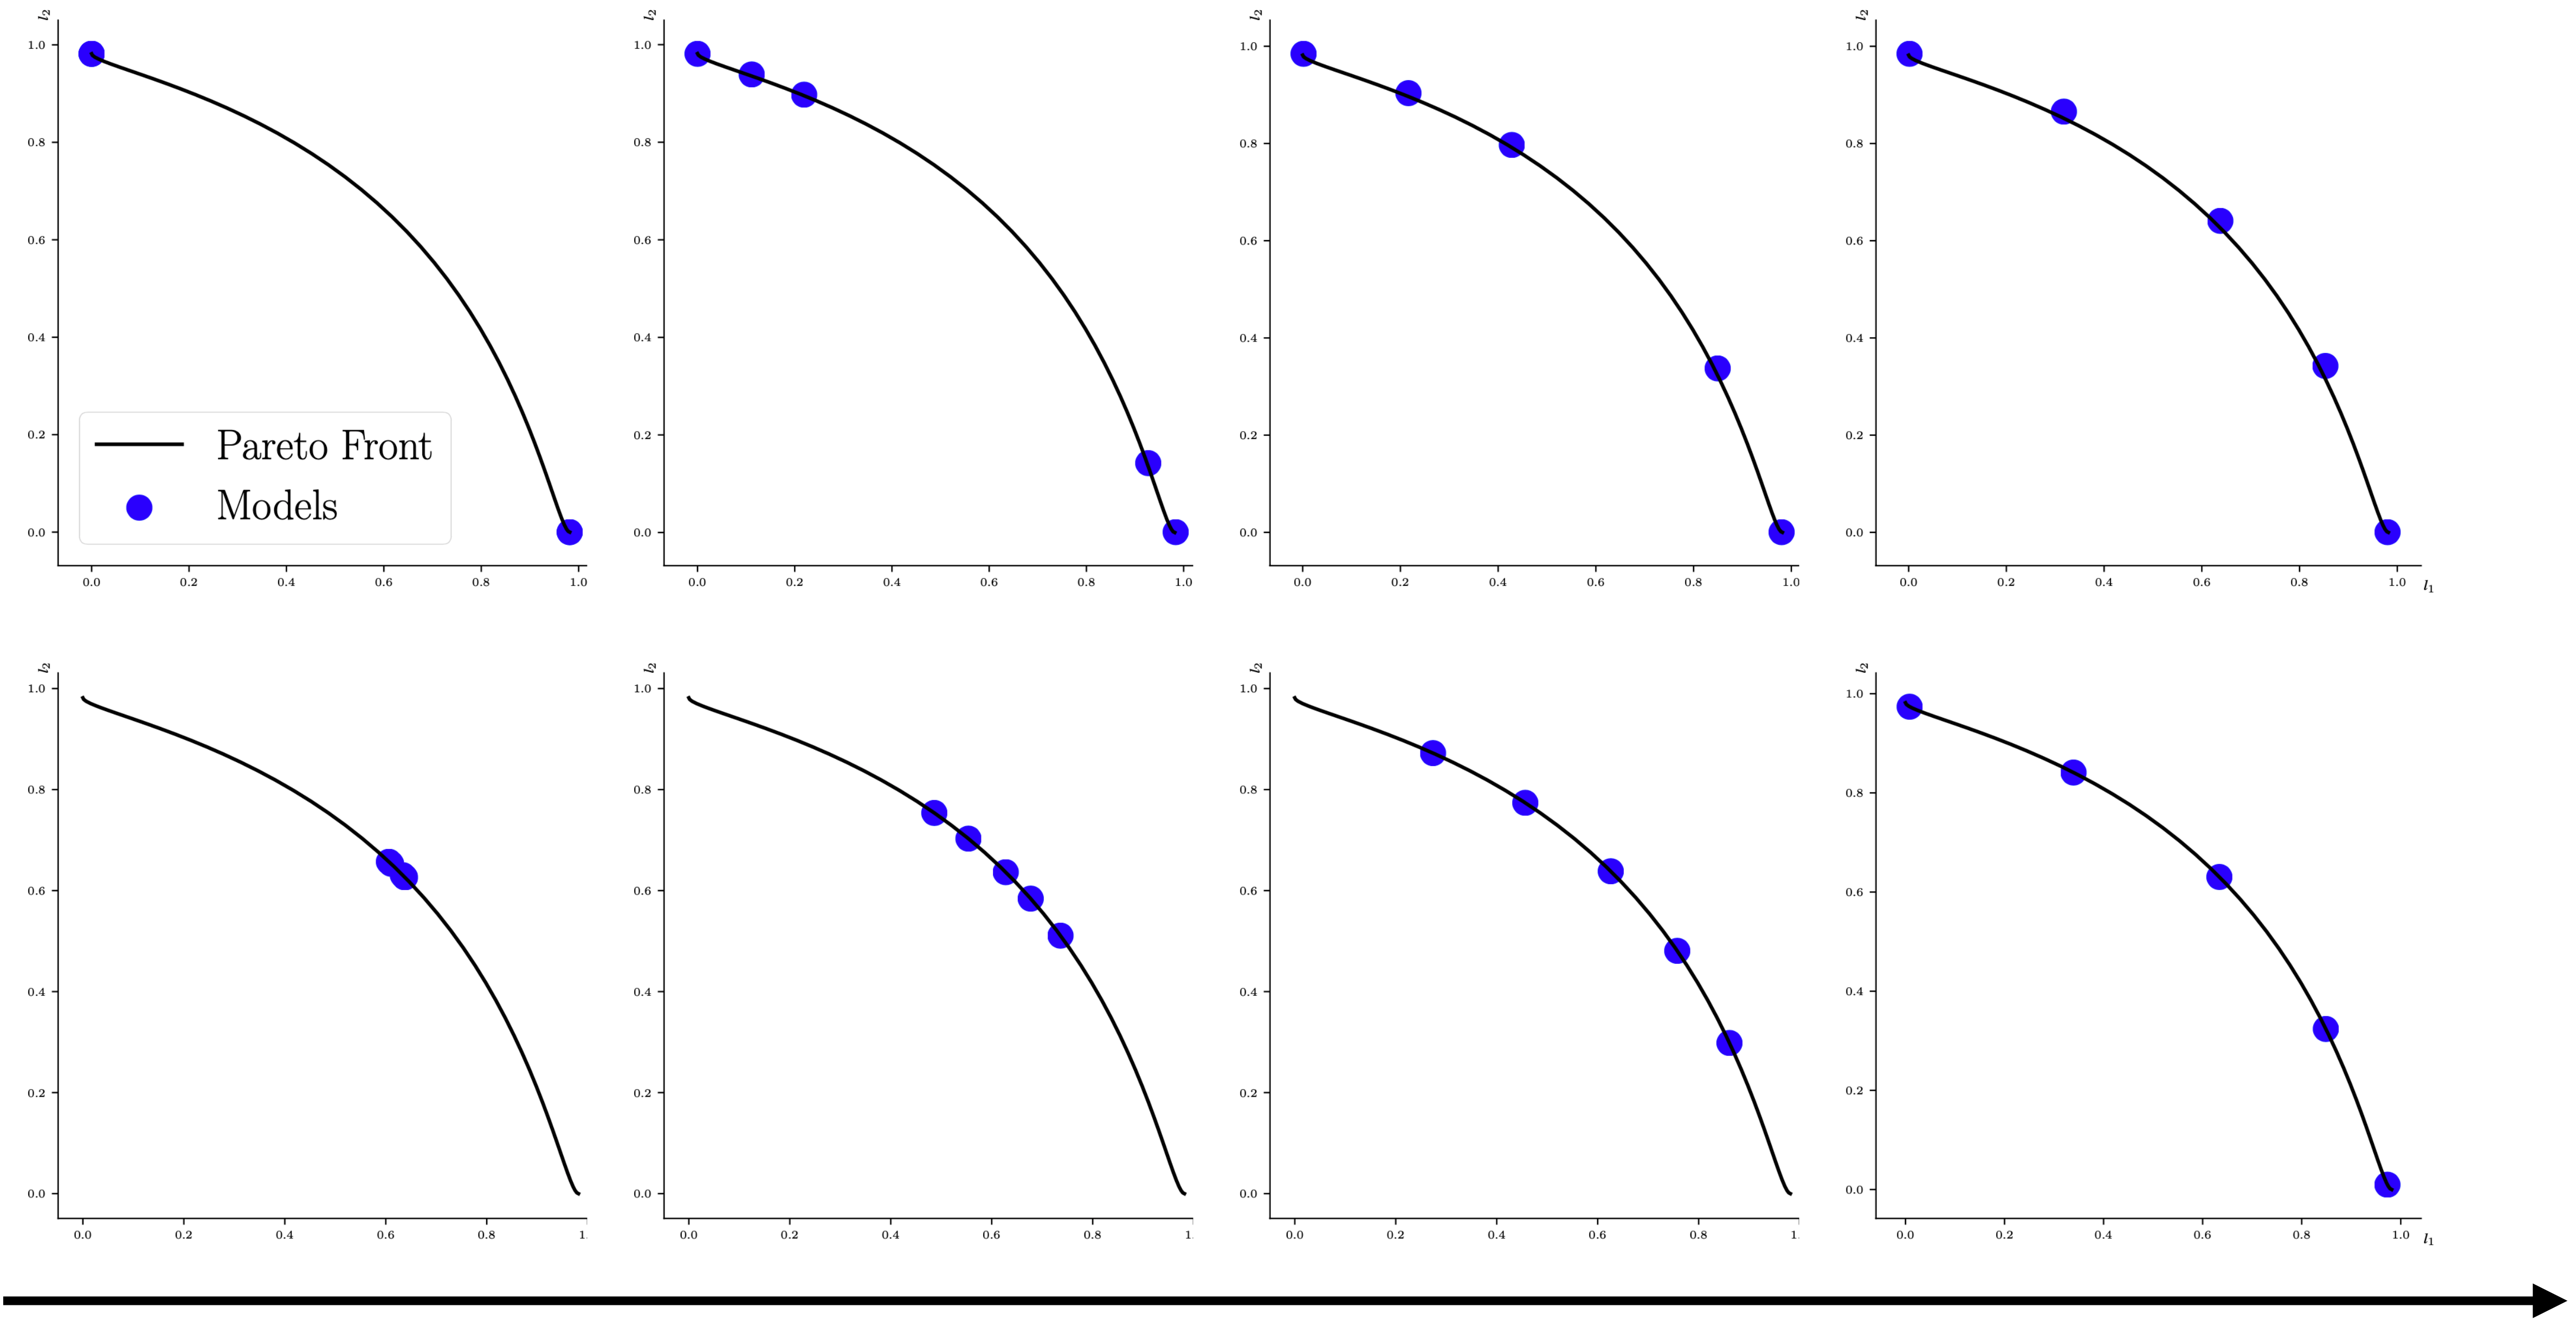

Iterations

Supplement: supplementary_material [file attachment]

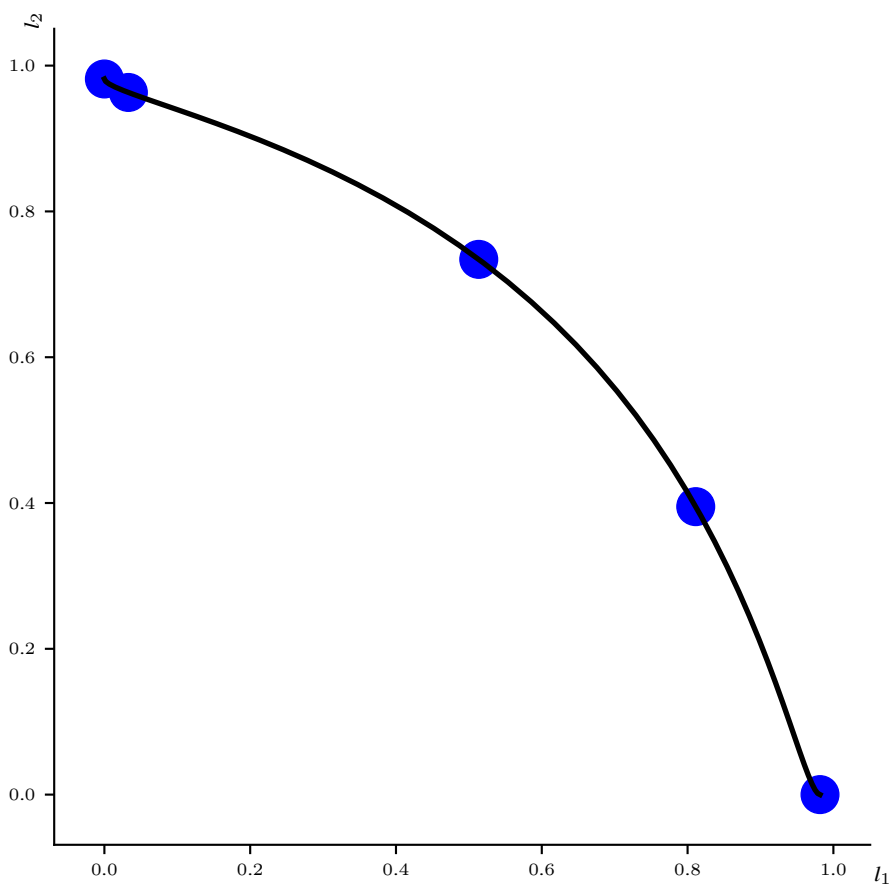

Supplement: supplementary_material [file attachment]

# task preference

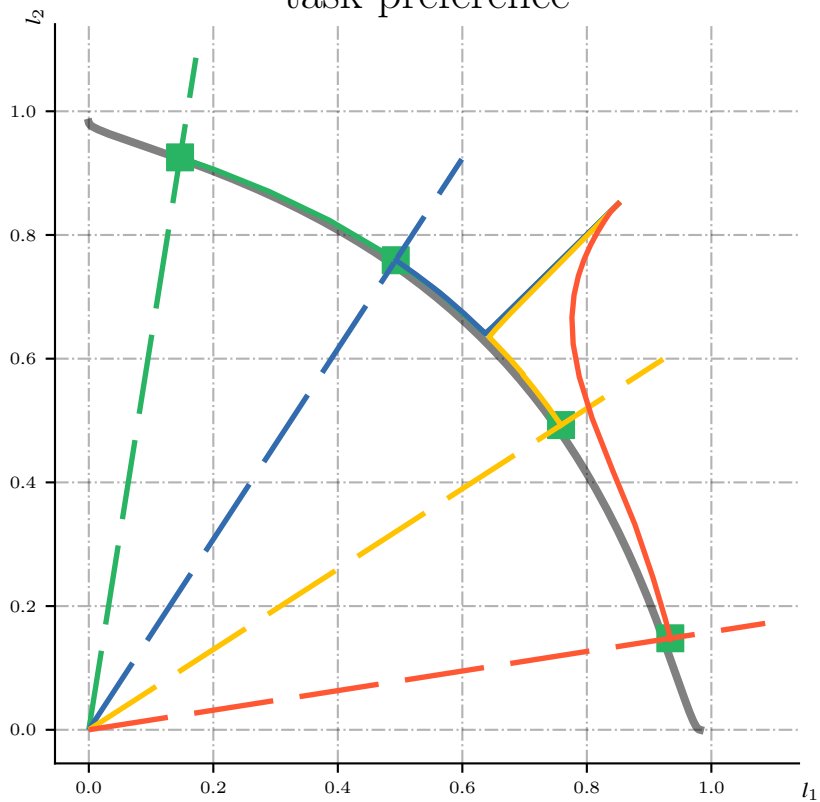

Supplement: supplementary_material [file attachment]

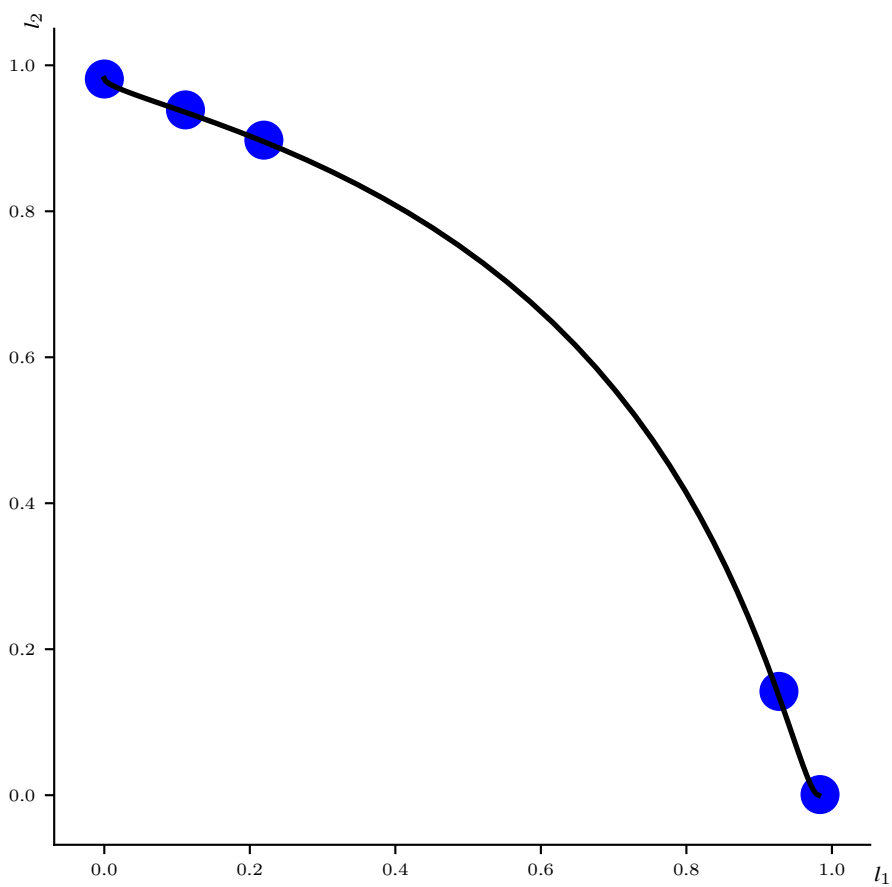

Supplement: supplementary_material [file attachment]

# weighted distance

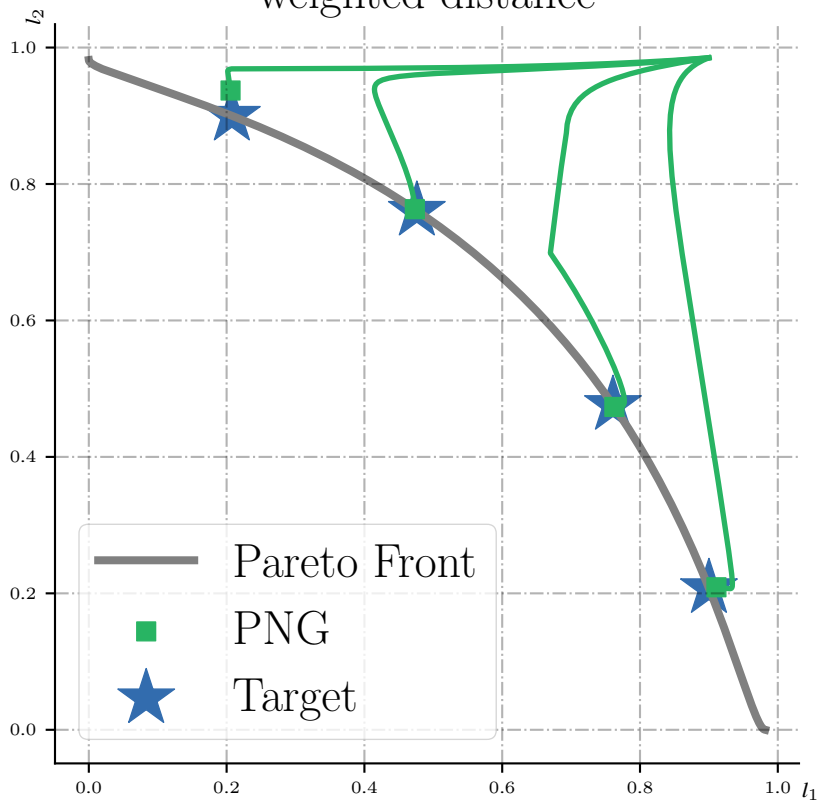

Supplement: supplementary_material [file attachment]

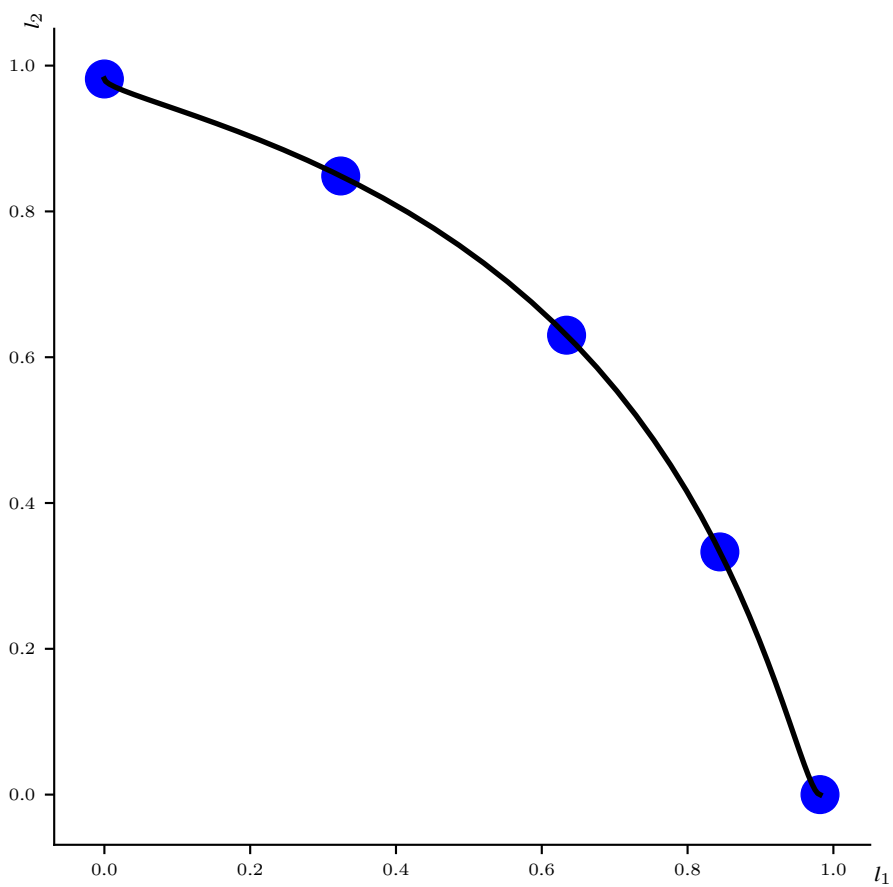

Supplement: supplementary_material [file attachment]

# complex cosine

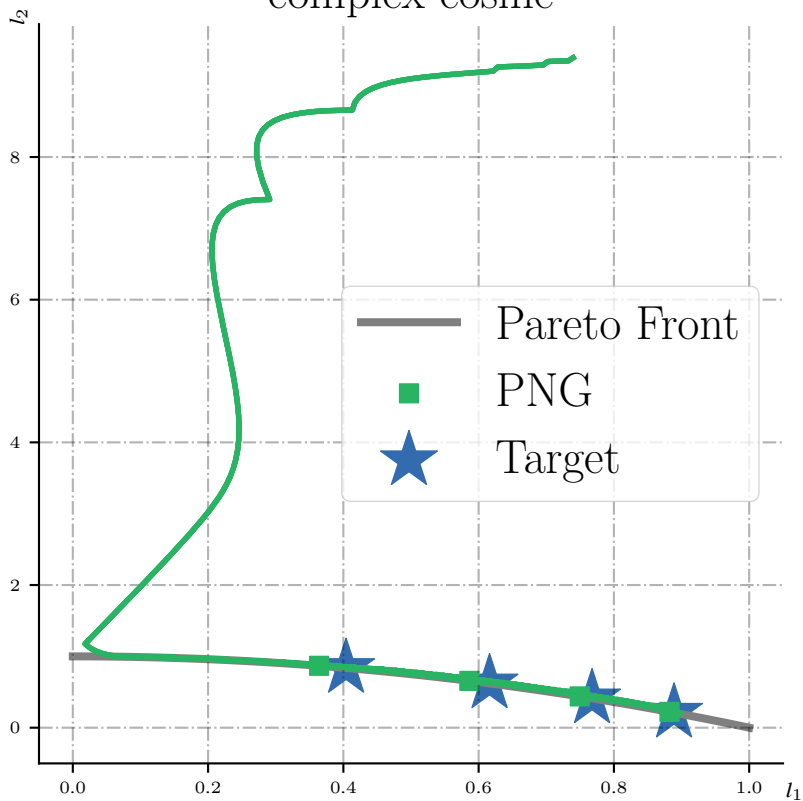

Supplement: supplementary_material [file attachment]

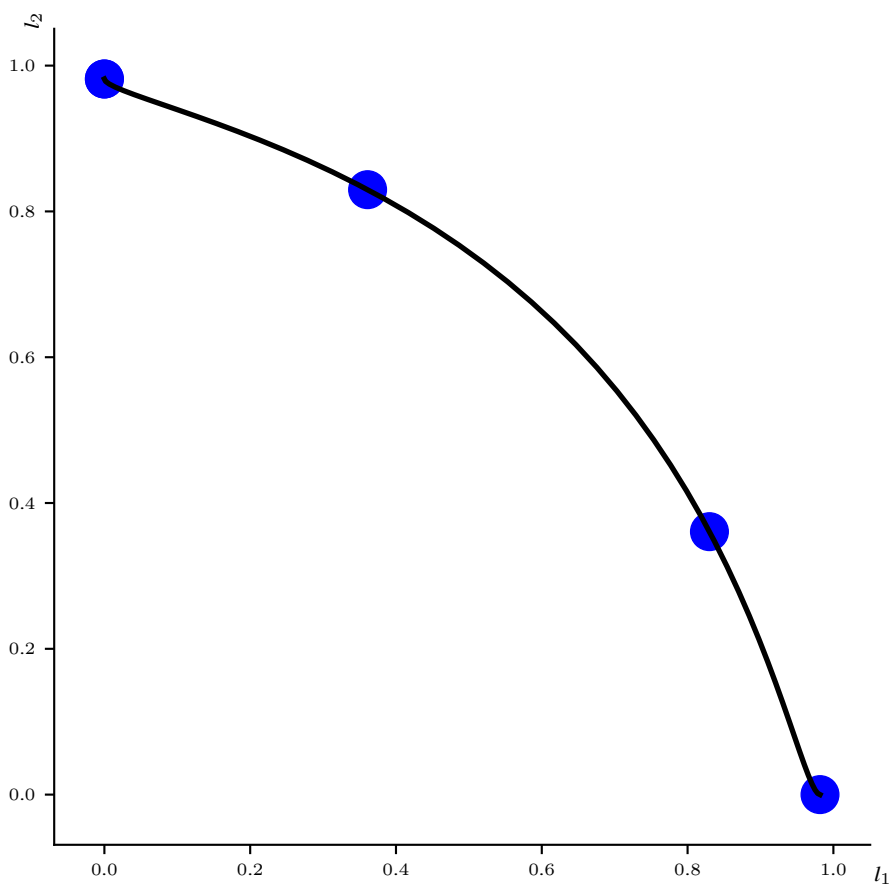

Supplement: supplementary_material [file attachment]

# weighted distance

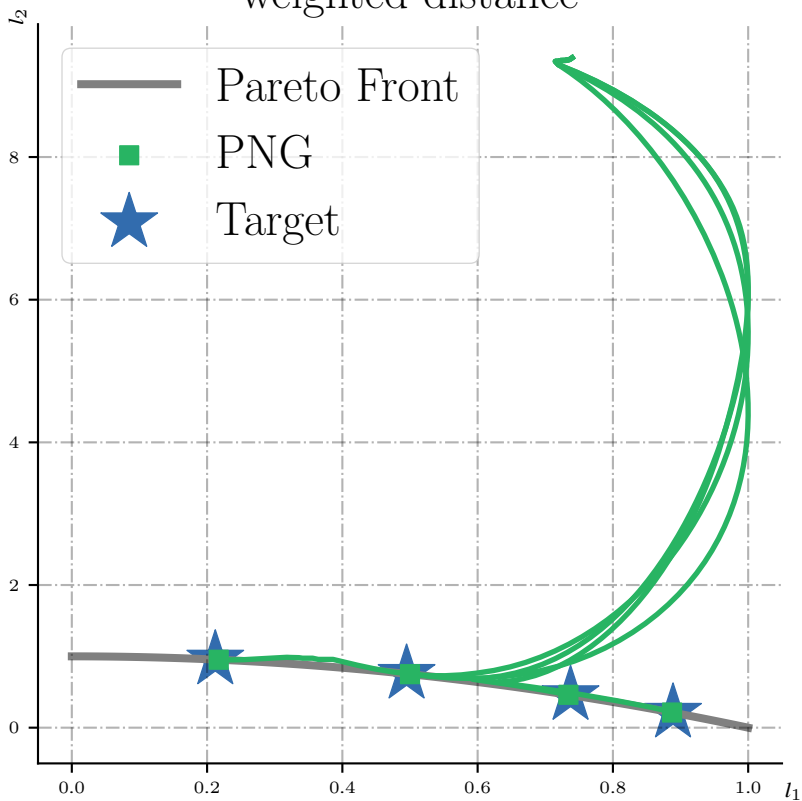

Supplement: supplementary_material [file attachment]

# task preference

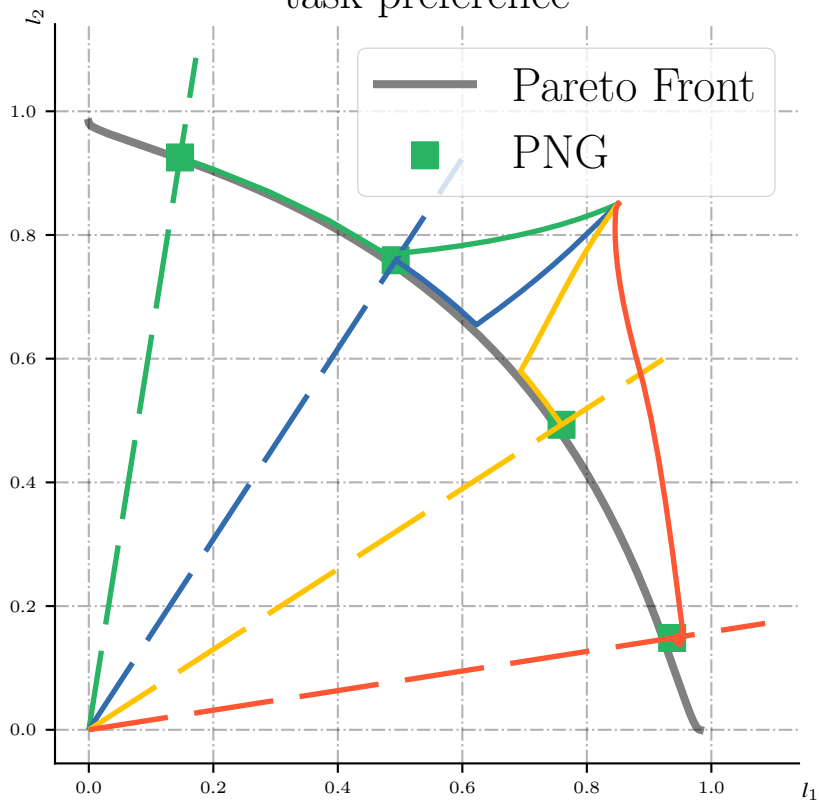

Supplement: supplementary_material [file attachment]

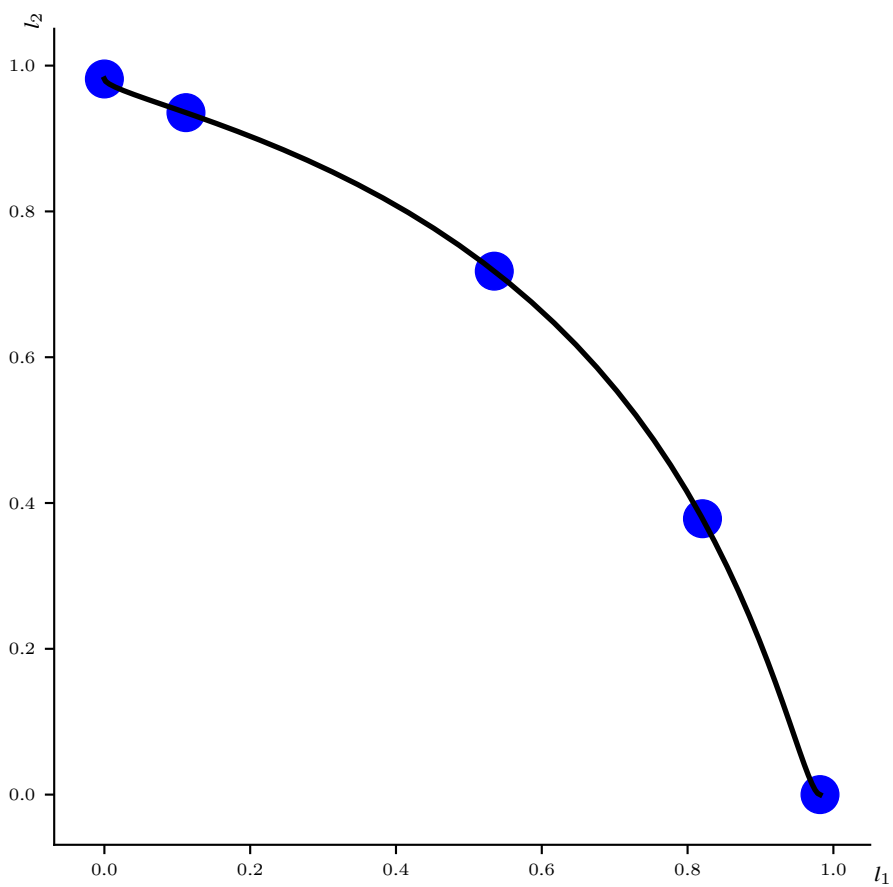

Supplement: supplementary_material [file attachment]

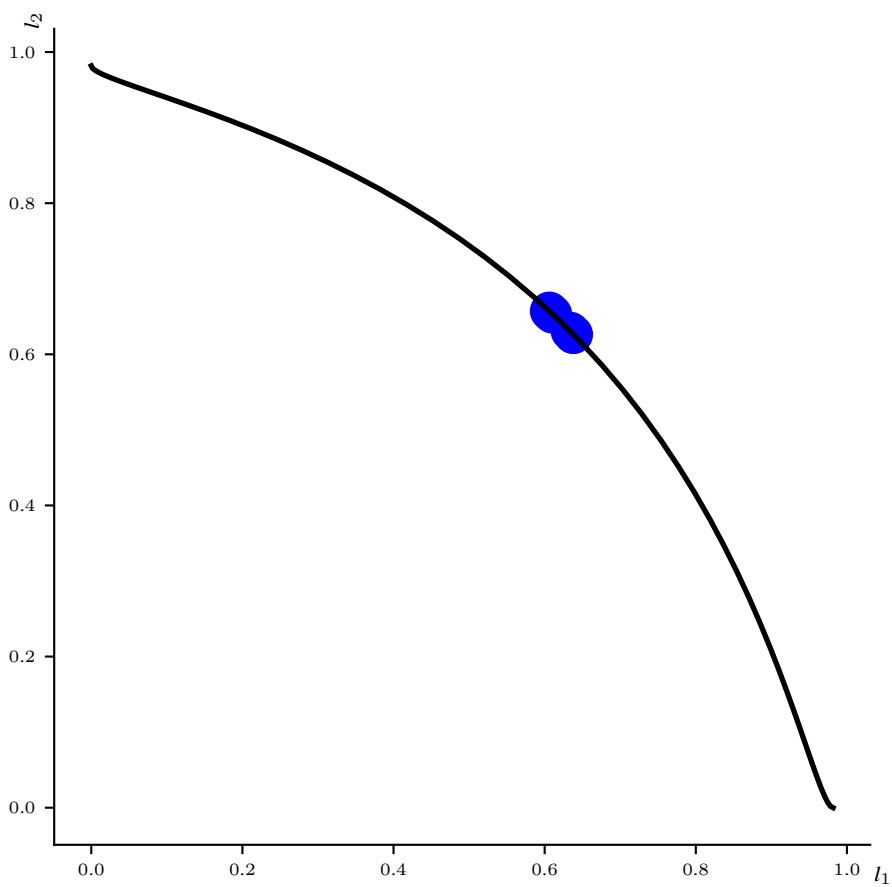

Supplement: supplementary_material [file attachment]

# complex cosine

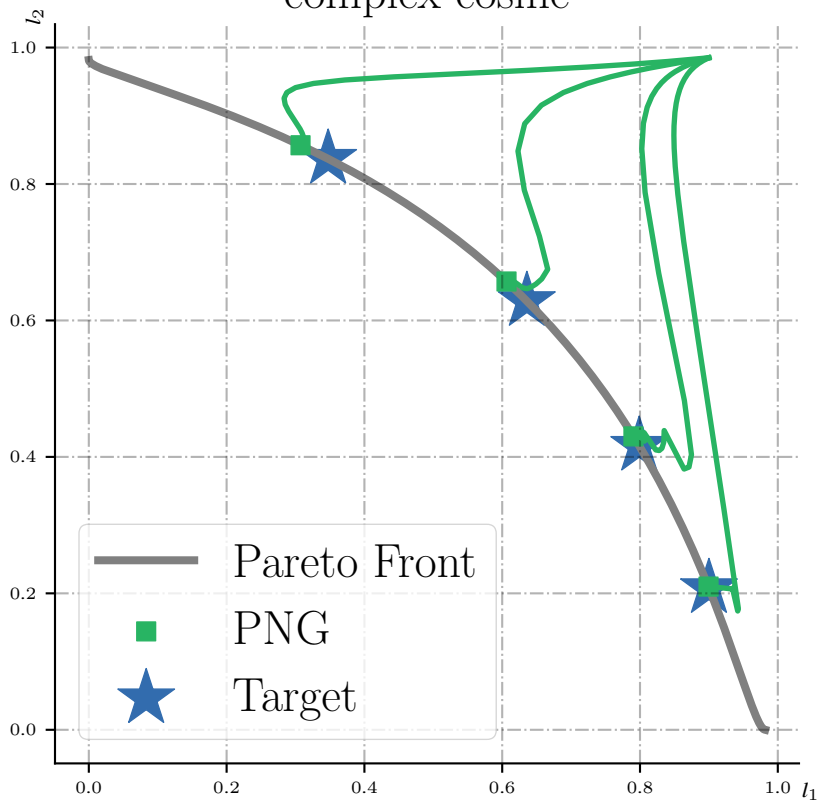

Supplement: supplementary_material [file attachment]

# task preference

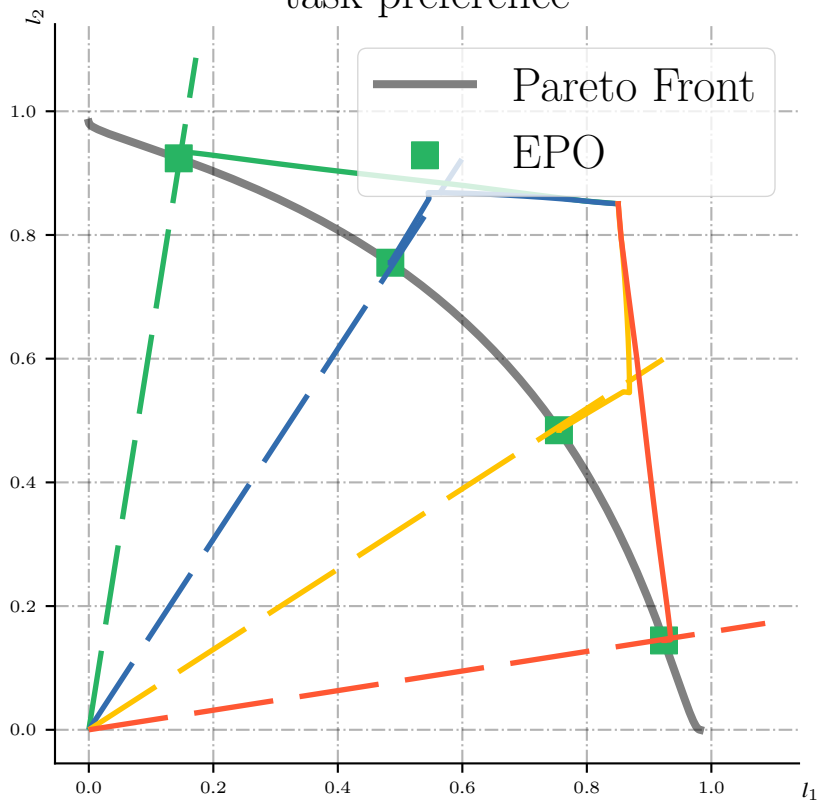

Supplement: supplementary_material [file attachment]

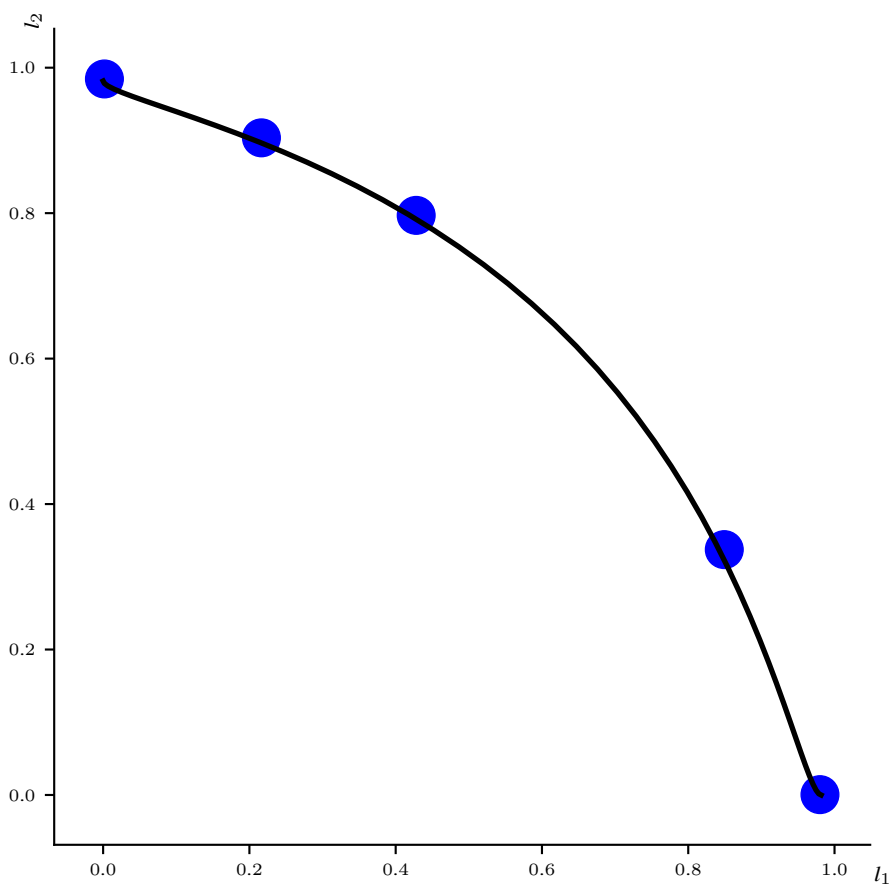

Supplement: supplementary_material [file attachment]

# task preference

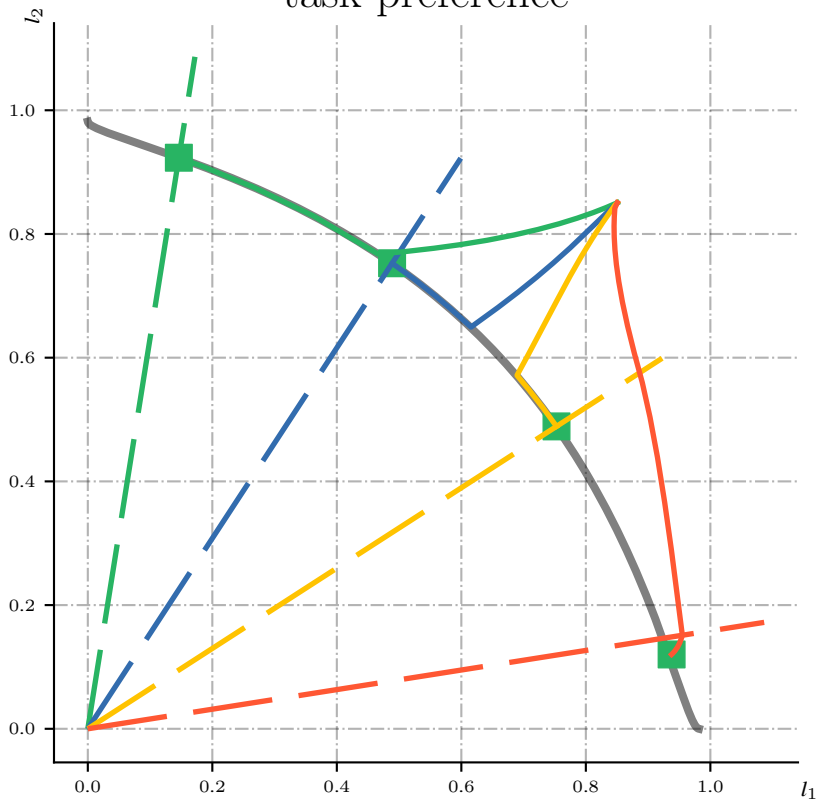

Supplement: supplementary_material [file attachment]
